# Supplementary material for: BEMOVI, software for extracting behavior and morphology from videos, illustrated with analyses of microbes
Source: PubMed Central journal article supplement (PMC4523355; doi:10.1002/ece3.1529), 2015-06-04
Supplement: ece30005-2584-sd4.pdf [file ece30005-2584-sd4.pdf]

SUPPLEMENTARY MATERIAL for

BEMOVI, software for extracting BEhaviour and  
MOrphology from VIdeos, illustrated with analyses of  
microbes

| variable name   | description                                                      | measure                                                                                |
|-----------------|------------------------------------------------------------------|----------------------------------------------------------------------------------------|
| area            | cross-section of cell                                            | mean and STD                                                                           |
| perimeter       | perimeter of cell                                                | mean and STD                                                                           |
| major           | major axis of fitted ellipse i.e. length of cell                 | mean and STD                                                                           |
| ar              | aspect ratio of fitted ellipse ( $\frac{majoraxis}{minoraxis}$ ) | mean and STD                                                                           |
| turning angle   | relative change in direction compared to previous step           | circular mean and STD                                                                  |
| gross_disp      | gross displacement                                               | sum of individual step lengths                                                         |
| max_net         | max net displacement                                             | maximum of beeline distance between the starting position and each subsequent position |
| net_disp        | net displacement                                                 | beeline distance between the first and the last position                               |
| net_speed       | speed                                                            | $\frac{netdisplacement}{trajectoryduration}$                                           |
| max_step        | step length                                                      | maximum distance covered in one step i.e. between two frames                           |
| min_step        | step length                                                      | minimum distance covered in one step i.e. between two frames                           |
| sd_step         | step length                                                      | STD in step length                                                                     |
| sd_gross_speed  | gross movement speed                                             | $\frac{grossdisplacement}{duration}$                                                   |
| max_gross_speed | maximum gross movement speed                                     | maximum of $\frac{grossdisplacement}{duration}$                                        |
| min_gross_speed | minimum gross movement speed                                     | minimum of $\frac{grossdisplacement}{duration}$                                        |

Table S1: Overview of traits/measures used in the automatic classification of species. STD = standard deviation

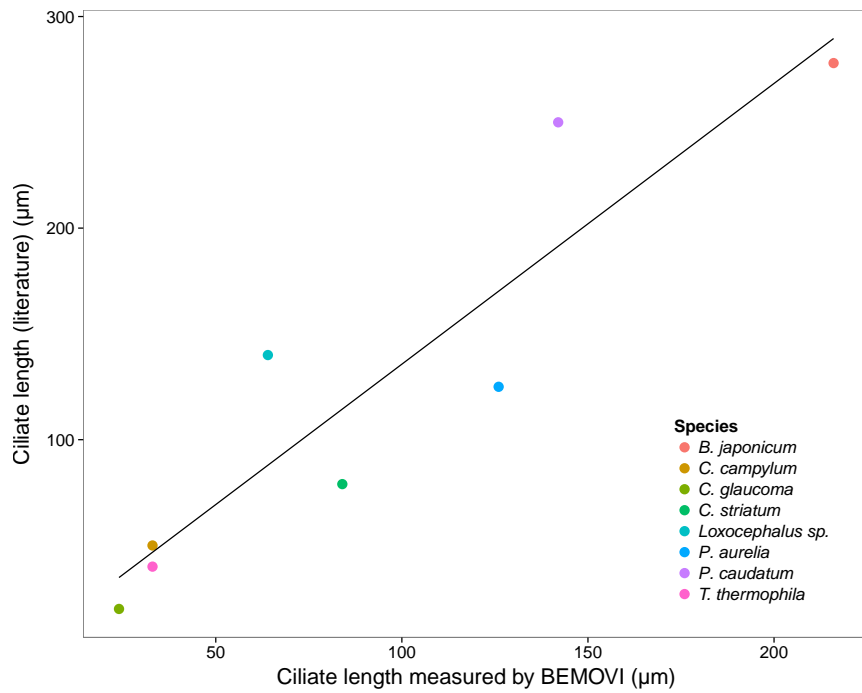

Figure S1: Positive correlation between ciliate cell length measurements (collected from literature and online resources) and cell length measured by BEMOVI.
